# Supplementary material for: SUMOylation Confers Posttranslational Stability on NPM-ALK Oncogenic Protein
Source: PubMed Central journal article supplement — Neoplasia. 2015 Oct 19;17(9):742–54. doi: 10.1016/j.neo.2015.09.005 (PMC4611074; doi:10.1016/j.neo.2015.09.005), 2015-10-19
Supplement: mmc1.pdf [file mmc1.pdf]

## SUMO consensus motifs in NPM-ALK

|     |            |            |            |            |            |
|-----|------------|------------|------------|------------|------------|
| 1   | MEDSMDMDMS | PLRPQNYLFG | CELKADKDYH | FKVDNDENEH | QLSLRTVSLG |
| 51  | AGAKDELHIV | EAEAMNYEGS | PIKVTLATLK | MSVQPTVSLG | GFEITPPVVL |
| 101 | RLKCGSGPVH | ISGQHLVVYR | RKHQELQAMA | MELQSPEYKL | SKLRTSTIMT |
| 151 | DYNPNYCFAG | KTSSISDLKE | VPRKNITLIR | GLGHGAFGEV | YEGQVSGMPN |
| 201 | DPSPLQVAVK | TLPEVCSEQD | ELDFLMEALI | ISKFNHQNV  | RCIGVSLQSL |
| 251 | PRFILLELMA | GGDLKSFLRE | TRPRPSQPSS | LAMLDLLHVA | RDIACGCQYL |
| 301 | EENHFIHRDI | AARNCLLTCF | GPGRVAKIGD | FGMARDIYRA | SYYRKGCCAM |
| 351 | LPVKWMPPEA | FMEGIFTSKT | DTWSFGVLLW | EIFSLGYMPY | PSKSNQEVLE |
| 401 | FVTSGGRMDP | PKNCPGPVYR | IMTQCWQHQP | EDRPNFAIL  | ERIEYCTQDP |
| 451 | DVINTALPIE | YGPLVEEEEK | VPVRPKDPEG | VPPLLSQQA  | KREERSPAA  |
| 501 | PPPLPTSSG  | KAARKPTAAE | VSVRVPGRPA | VEGGHVNMAF | SQSNPPSELH |
| 551 | KVHGSRNKPT | SLWNPTYGSW | FTEKPTKKNN | PIAKKEPHDR | GNLGLEGSCT |
| 601 | VPPNVATGRL | PGASLLEPS  | SLTANMKEVP | LFRLRHFPCC | NVNYGYQQQG |
| 651 | LPLEAATAPG | AGHYEDTILK | SKNSMNQPGP |            |            |

| No. | Pos. | Group            | Score | No. | Pos. | Group             | Score |
|-----|------|------------------|-------|-----|------|-------------------|-------|
| 1   | K24  | LFGCE LKAD KDYHF | 0.91  | 8   | K327 | GPGRV AKIG DFGMA  | 0.62  |
| 2   | K32  | DKDYH FKVD NDENE | 0.85  | 9   | K265 | MAGGD LKSF LRETR  | 0.56  |
| 3   | K54  | SLGAG AKDE LHIVE | 0.79  | 10  | K476 | KVPVR PKDP EGVPP  | 0.50  |
| 4   | K491 | LVSQQ AKRE EERSP | 0.79  | 11  | K470 | LVEEE EKVP VRPKD  | 0.39  |
| 5   | K584 | KNNPI AKKE PHDRG | 0.79  | 12  | K585 | NNPIA KKEP HDRGN  | 0.37  |
| 6   | K103 | PVVLR LKCG SGPVH | 0.73  | 13  | K345 | RASY Y RKGG CAMLP | 0.27  |
| 7   | K514 | SSGKA AKKP TAAEV | 0.69  |     |      |                   |       |

- Motifs with high probability
- Motifs with low probability
- Overlapping Motifs
